# Supplementary material
Source: Hindawi journal article supplement (doi:10.1155/2012/257392)

Supplementary Fig. 1

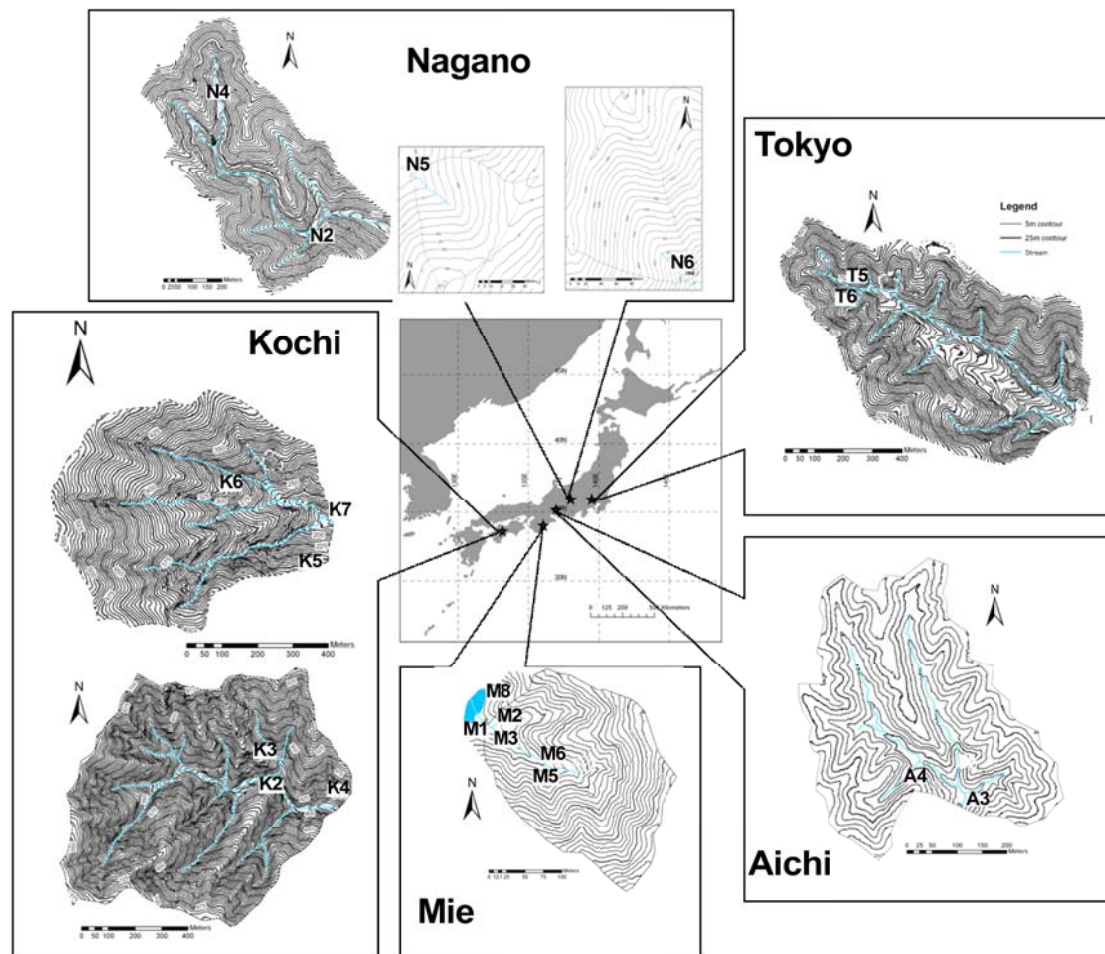

Supplement: f1 [file 257392.f1.pdf]
