# Supplementary material
Source: Hindawi journal article supplement (doi:10.1155/2012/257392)
Supplement: f2 [file 257392.f2.pdf]

Supplementary Table 1

Summary information for each sampling site in the five study regions

| Region | Location                | Mean precipitation (mm yr <sup>-1</sup> ) | Mean temperature (°C) | Watershed code | Watershed characteristic | M.E. (m) | Watershed area (ha) |
|--------|-------------------------|-------------------------------------------|-----------------------|----------------|--------------------------|----------|---------------------|
| Aichi  | 136°57.9'E<br>35°10.0'N | 2108                                      | 15.4                  | A3             | Cypress forested         | 161      | 3                   |
|        |                         |                                           |                       | A4             | DB forested              | 175      | 3.5                 |
| Kochi  | 133°07.7'E<br>33°12.4'N | 2782                                      | 14.6                  | K2             | DB forested              | 381      | 45.3                |
|        |                         |                                           |                       | K3             | DB forested              | 556      | 4.9                 |
|        |                         |                                           |                       | K4             | Cedar forested           | 481      | 2.0                 |
|        |                         |                                           |                       | K5             | Cedar and cypress        | 470      | 55.7                |
|        |                         |                                           |                       | K6             | Cypress forested         | 381      | 5.7                 |
|        |                         |                                           |                       | K7             | Cypress forested         | 368      | 33.2                |
| Mie    | 136°23.4'E<br>34°26.9'N | 2560                                      | 14.2                  | M1             | Cypress forested         | 180      | 4.9                 |
|        |                         |                                           |                       | M2             | Cypress forested         | 161      | 1.2                 |
|        |                         |                                           |                       | M3             | Cypress forested         | 183      | 3.5                 |
|        |                         |                                           |                       | M4             | Cypress forested         | 152      | 0.1                 |
|        |                         |                                           |                       | M5             | Cypress forested         | 181      | 0.3                 |
|        |                         |                                           |                       | M8             | DB forested              | 133      | 0.2                 |
| Nagano | 138°22.5'E<br>36°52.4'N | 1487                                      | 10.8                  | N2             | Cypress forested         | 1153     | 25                  |
|        |                         |                                           |                       | N4             | Cypress forested         | 1205     | 4.7                 |
|        |                         |                                           |                       | N5             | Larch forested           | 1153     | 25                  |
|        |                         |                                           |                       | N6             | DB forested              | 1270     | 1.8                 |
| Tokyo  | 139°18.7'E<br>35°47.3'N | 1504                                      | 13.6                  | T5             | Cedar and Cypress        | 770      | 1.3                 |
|        |                         |                                           |                       | T6             | DB forested              | 778      | 1.6                 |

Footnotes:

- Watershed codes are showed in Fig. 1;
- M.E. in the table means the medium elevation;
- DB is the deciduous broadleaf type of forest;
- Cypress: *Chamaecyparis obtuse*; Cedar: *Cryptomeria japonica*.
